# Supplementary material for: The role of phosphoric acid in the crystallization of lenalidomide form DH–water system
Source: Royal Society of Chemistry journal article supplement (doi:10.1039/d2ce00905f), 2022-01-01
Supplement: d2ce00905f4.pdf [file d2ce00905f4.pdf]

## Supporting Information

### **Roles of phosphoric acid on crystallization of Lenalidomide Form DH – water system**

Ruili Liang<sup>a</sup>, Yitong Zhu<sup>a</sup>, Yanyang Wu<sup>a</sup>, Xing Gu<sup>a</sup>, Xiangyang Zhang<sup>a,\*</sup>

<sup>a</sup> State Key Laboratory of Chemical Engineering, East China University of Science and Technology, Shanghai 200237, China

### **List of table and figure captions**

**Figure S1.** PXRD pattern of undissolved solid after solubility experiments.

**Figure S2.** PXRD pattern of crystals after crystallization experiments.

**Table S1.** The induction time of dicyandiamide in water.

**Table S2** The maximum, average, minimum induction time of LDM Form DH in pure water and phosphoric acid solution.

**Figure S1.** PXRD pattern of undissolved solid after solubility experiments.

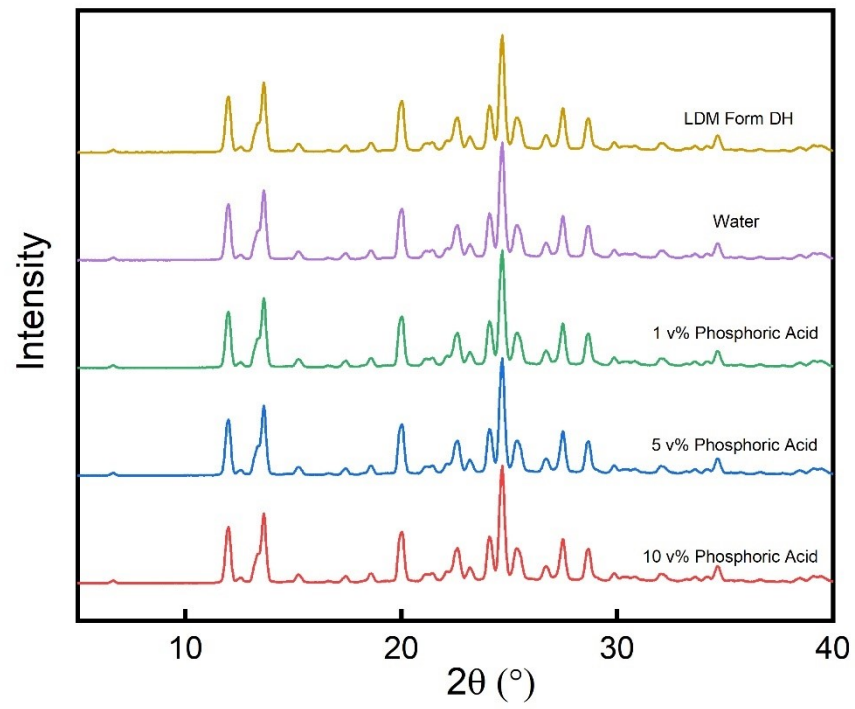

**Figure S2.** PXRD pattern of crystals after crystallization experiments.

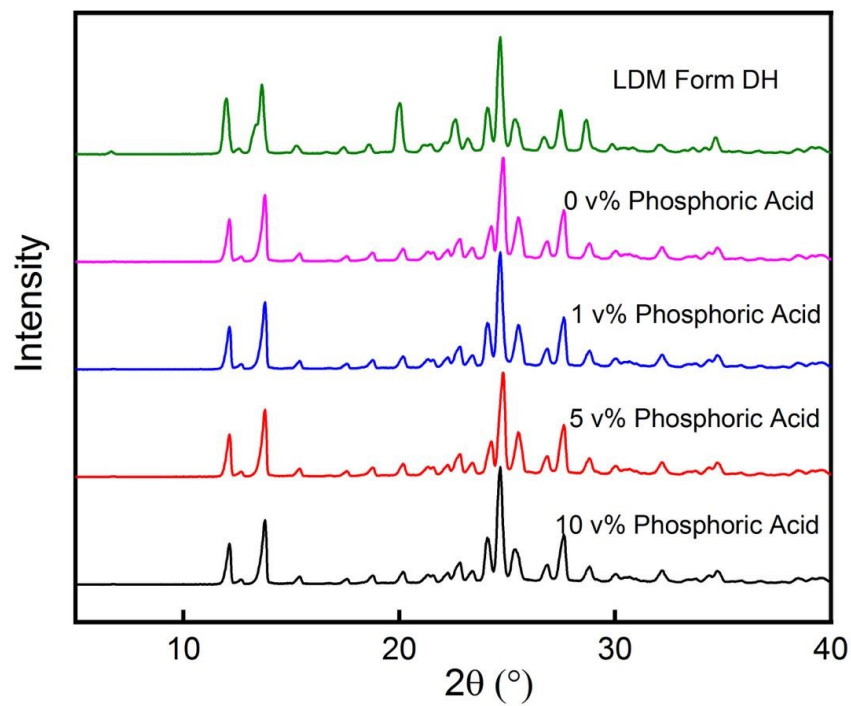

**Table S1.** Mole fraction solubility of LDM Forms DH in different volume ratios (v%) of phosphoric acid solutions (0 v%, 1 v%, 5 v%, 10 v%) under different temperature (T) and atmospheric pressure (p = 0.1 MPa).<sup>a</sup>

| Phosphoric Acid solutions | T (K)  | $10^4x_1$ (mol/mol) | $10^4x_{cal}$ (mol/mol) | RD (%) |
|---------------------------|--------|---------------------|-------------------------|--------|
| 0 v%                      | 303.15 | 0.11                | 0.08                    | 21.07  |
|                           | 313.15 | 0.25                | 0.19                    | 24.77  |
|                           | 323.15 | 0.37                | 0.39                    | -4.97  |
|                           | 333.15 | 0.67                | 0.77                    | -14.59 |
|                           | 343.15 | 0.99                | 1.46                    | -47.36 |
| 1 v%                      | 303.15 | 1.82                | 1.89                    | -2.09  |
|                           | 313.15 | 2.06                | 2.01                    | 2.06   |
|                           | 323.15 | 2.32                | 2.29                    | 1.45   |
|                           | 333.15 | 2.78                | 2.73                    | 0.47   |
|                           | 343.15 | 3.12                | 3.18                    | -2.06  |
| 5 v%                      | 303.15 | 10.70               | 11.05                   | -3.28  |
|                           | 313.15 | 12.71               | 12.24                   | 3.68   |
|                           | 323.15 | 14.81               | 14.50                   | 2.06   |
|                           | 333.15 | 18.24               | 18.16                   | 0.46   |
|                           | 343.15 | 23.06               | 23.89                   | -3.59  |
| 10 v%                     | 303.15 | 20.28               | 20.99                   | -3.52  |
|                           | 313.15 | 24.34               | 23.87                   | 1.91   |
|                           | 323.15 | 30.73               | 28.91                   | 5.92   |
|                           | 333.15 | 37.44               | 36.94                   | 1.33   |
|                           | 343.15 | 46.45               | 49.74                   | -7.07  |

<sup>a</sup> Standard uncertainties  $u$  are  $u(x)=\pm 0.00005$ ,  $u(T)=\pm 0.01$  K,  $u(v)=\pm 0.01\%$ ,  $(p)=\pm 0.0025$ MPa. The volume fractions of phosphoric acid( $v$ ) corresponds to the volume fraction of phosphoric acid in the binary (phosphoric acid+water) solvent.  $x_{cal}$  are the calculated values of Forms DH by NRTL model.

**Table S2** The maximum, average, minimum induction time of LDM Form DH in pure water and phosphoric acid solution<sup>a</sup>.

| Pure water            |      |                   |                  |                  |
|-----------------------|------|-------------------|------------------|------------------|
| $\Delta T$            | $S$  | $mean t_{ind}(s)$ | $max t_{ind}(s)$ | $min t_{ind}(s)$ |
| 12                    | 2.03 | 7864              | 10223            | 3964             |
| 14                    | 2.32 | 4996              | 7234             | 2137             |
| 16                    | 2.67 | 3592              | 6321             | 2098             |
| 18                    | 3.07 | 2684              | 4032             | 1386             |
| 1 v% Phosphoric Acid  |      |                   |                  |                  |
| $\Delta T$            | $S$  | $mean t_{ind}(s)$ | $max t_{ind}(s)$ | $min t_{ind}(s)$ |
| 12                    | 1.18 | 1801              | 3221             | 1076             |
| 14                    | 1.21 | 862               | 1532             | 672              |
| 16                    | 1.24 | 508               | 1263             | 304              |
| 18                    | 1.27 | 422               | 564              | 273              |
| 5 v% Phosphoric Acid  |      |                   |                  |                  |
| $\Delta T$            | $S$  | $mean t_{ind}(s)$ | $max t_{ind}(s)$ | $min t_{ind}(s)$ |
| 12                    | 1.26 | 2654              | 4981             | 1854             |
| 14                    | 1.30 | 1743              | 3176             | 894              |
| 16                    | 1.36 | 1267              | 1894             | 943              |
| 18                    | 1.41 | 909               | 1371             | 432              |
| 10 v% Phosphoric Acid |      |                   |                  |                  |
| $\Delta T$            | $S$  | $mean t_{ind}(s)$ | $max t_{ind}(s)$ | $min t_{ind}(s)$ |
| 12                    | 1.30 | 6049              | 8752             | 3358             |
| 14                    | 1.36 | 3964              | 5084             | 2480             |
| 16                    | 1.43 | 2505              | 4224             | 1082             |
| 18                    | 1.50 | 1439              | 2176             | 654              |

<sup>a</sup>  $\Delta T$  represents the temperature difference between initial temperature and nucleation temperature.  $S$  is the supersaturation calculated by solubility curve. The maximum, average, minimum induction time is from the induction time measurement
