# Supplementary figures and images for: The role of phosphoric acid in the crystallization of lenalidomide form DH–water system
Source: Royal Society of Chemistry journal article supplement (doi:10.1039/d2ce00905f), 2022-01-01

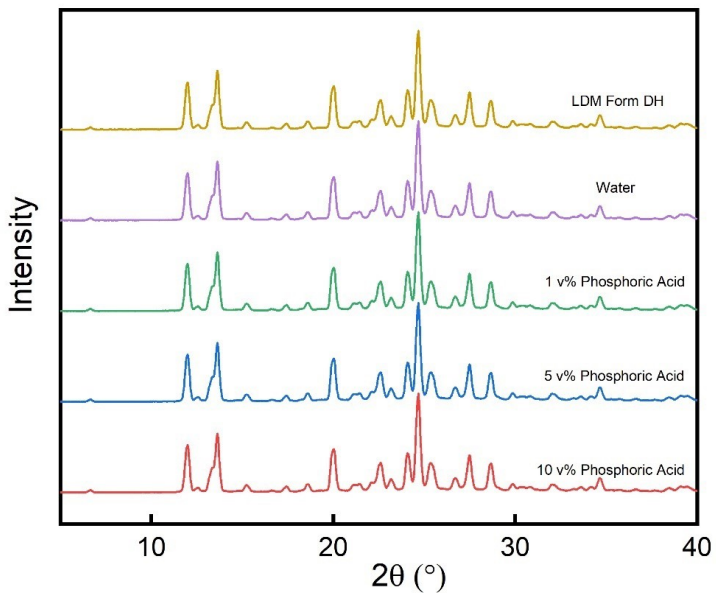

Supplement: d2ce00905f2.pdf [file d2ce00905f2.pdf]

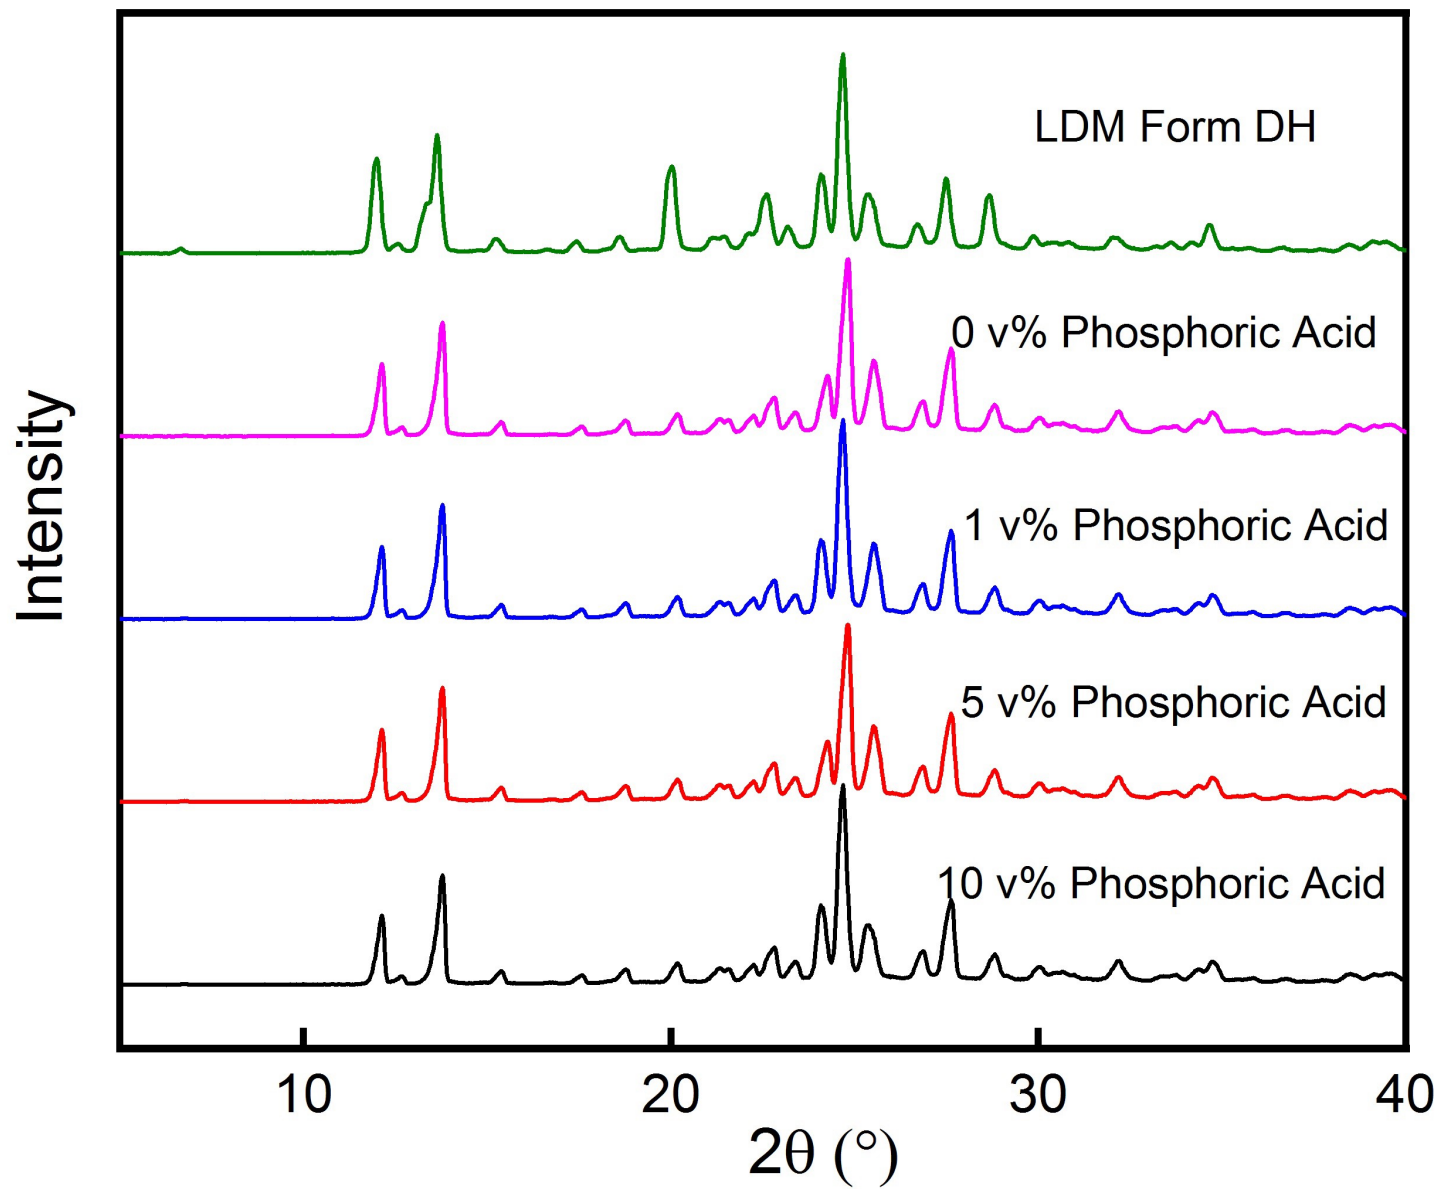

Supplement: d2ce00905f3.pdf [file d2ce00905f3.pdf]
